# Supplementary material for: The EphB6 receptor is overexpressed in pediatric T cell acute lymphoblastic leukemia and increases its sensitivity to doxorubicin treatment
Source: PubMed Central journal article supplement (PMC5676711; doi:10.1038/s41598-017-15200-3), 2017-11-07

**The EphB6 receptor is overexpressed in pediatric T cell acute lymphoblastic leukemia and increases its sensitivity to doxorubicin treatment**

Amr El Zawily, Emily McEwen, Behzad Toosi, Frederick S. Vizeacoumar, Tanya Freywald, Franco J. Vizeacoumar, and Andrew Freywald

## **Supplementary Figure Legends**

### **Supplementary Figure 1**

- A. Full- length unadjusted images of Western blots shown in Figure 2A
- B. Full- length unadjusted images of Western blots shown in Figure 2C
- C. Full- length unadjusted images of Western blots shown in Figure 2E

### **Supplementary Figure 2**

- A. Full- length unadjusted images of Western blots shown in Figure 3C

### **Supplementary Figure 3**

- A. Full- length unadjusted images of Western blots shown in Figure 4A
- B. Full- length unadjusted images of Western blots shown in Figure 4B
- C. Full- length unadjusted images of Western blots shown in Figure 4C

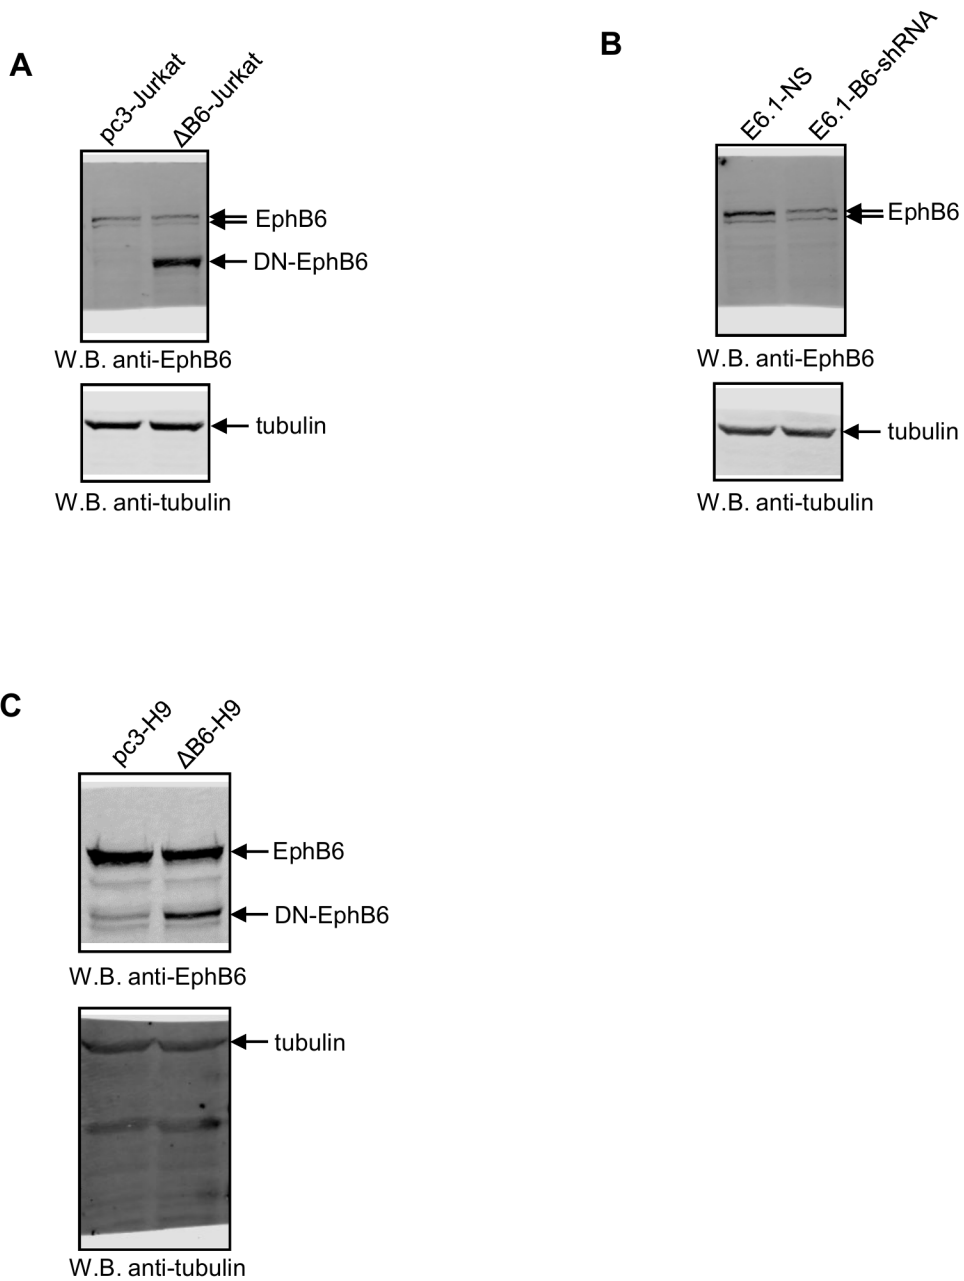

**A**

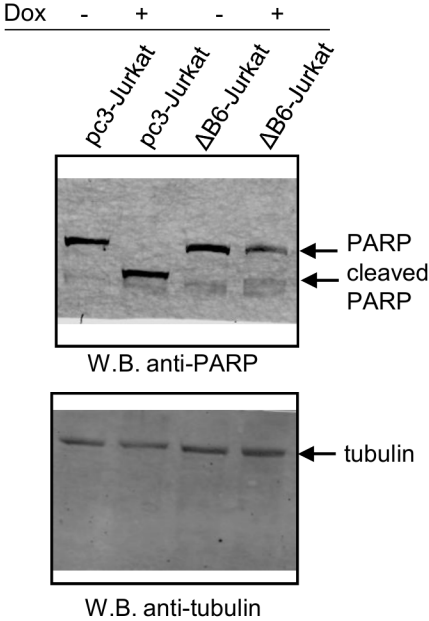

**A**

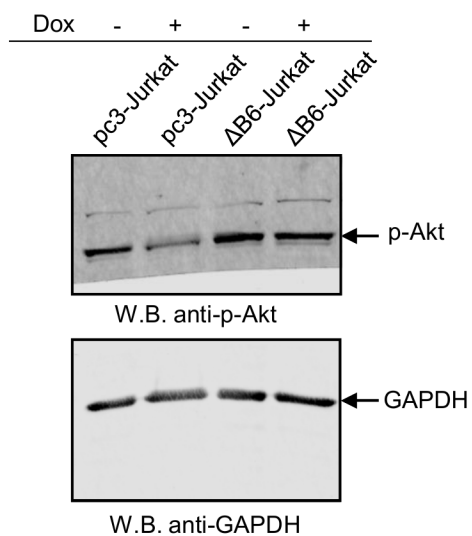

**B**

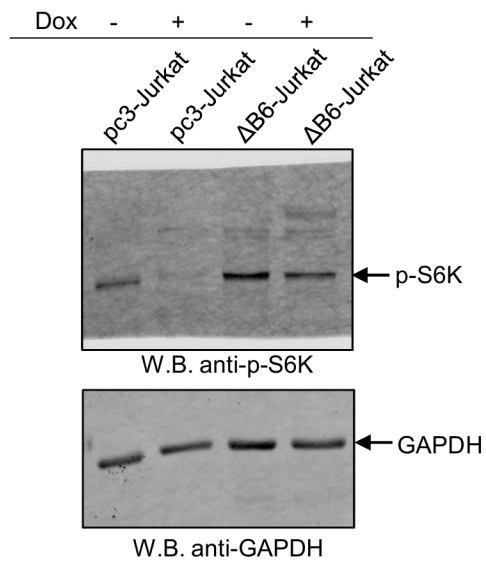

**C**

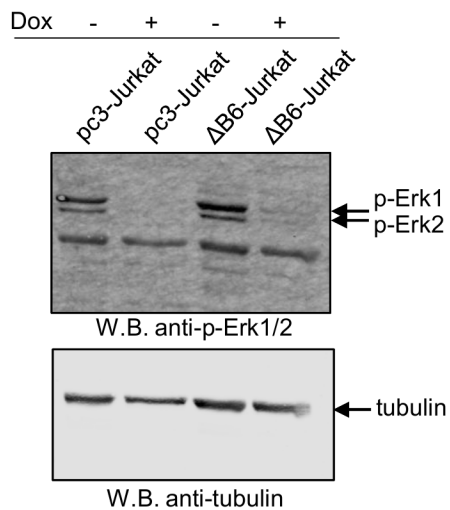

Supplement: 41598_2017_15200_MOESM1_ESM.pdf [file 41598_2017_15200_MOESM1_ESM.pdf]
